# Supplementary figures and images for: The Endocrine Disruptor Compound Bisphenol-A (BPA) Regulates the Intra-Tumoral Immune Microenvironment and Increases Lung Metastasis in an Experimental Model of Breast Cancer
Source: MDPI journal article supplement (doi:10.3390/ijms23052523), 2022-02-25

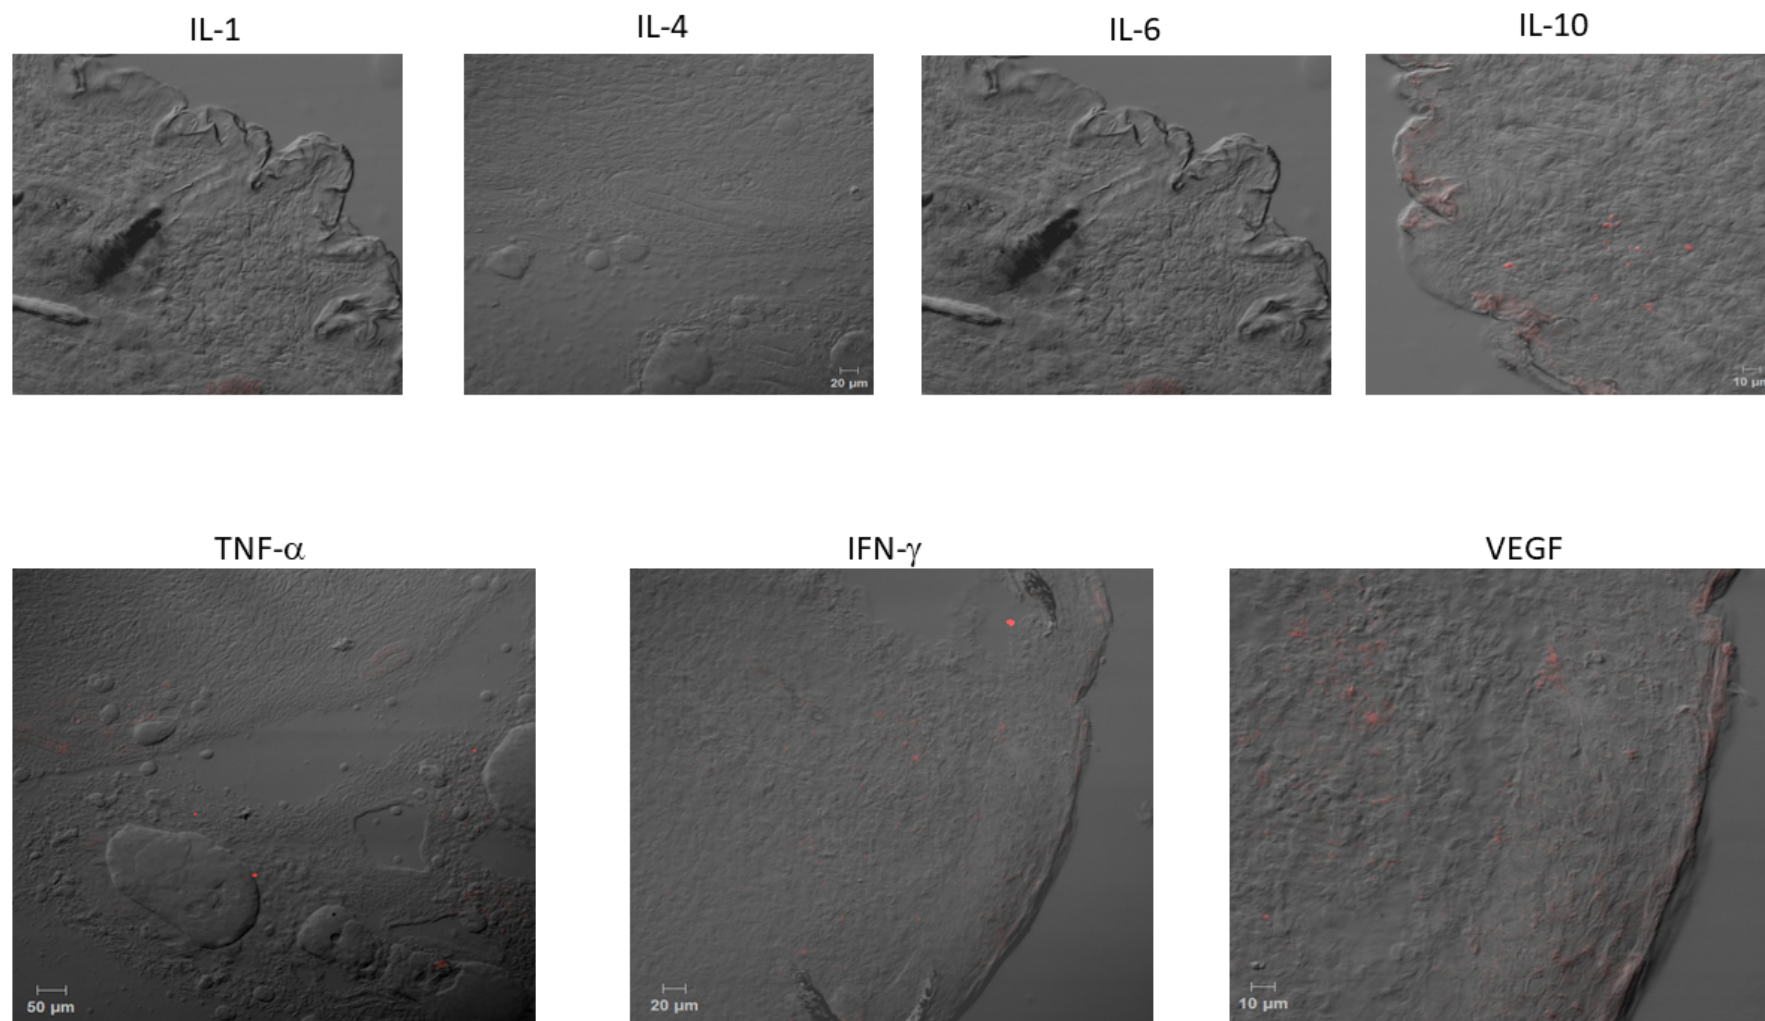

Figure S1. Different negative controls of each cytokine evaluated.

Supplement: s1 [file s1]
